# Supplementary material
Source: PubMed Central journal article supplement (PMC3361419)
Supplement: 1115433109_pnas.201115433SI.pdf [file 1115433109_pnas.201115433SI.pdf]

# Supporting Information

O'Donnell et al. 10.1073/pnas.1115433109

## SI Methods

**Western Blotting.** Antibodies for immunoblotting were as follows: anti-c-Myc XP rabbit monoclonal antibody (D84C12; Cell Sig-

naling), anti-TIF2 mouse monoclonal antibody (610985; BD Transduction Laboratories), and anti- $\alpha$ -tubulin mouse monoclonal antibody (clone DM1A; Calbiochem).

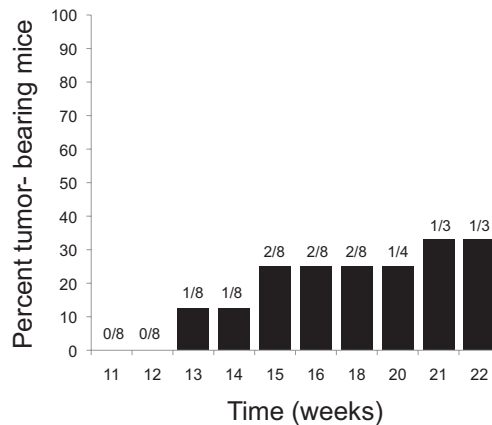

**Fig. S1.** Control experiment to determine tumor latency in the MYC liver tumor model on a mixed genetic background. Quantification of percentage of tet-o-MYC; LAPtTA animals expressing the tetracycline-repressible MYC transgene that developed liver tumors over time. Double-transgenic males were bred to C57BL/6J WT females to obtain tet-o-MYC; LAPtTA mice on a mixed background. MYC was induced at 6 wk of age, and three to eight mice were dissected each week from 11–22 wk of age.

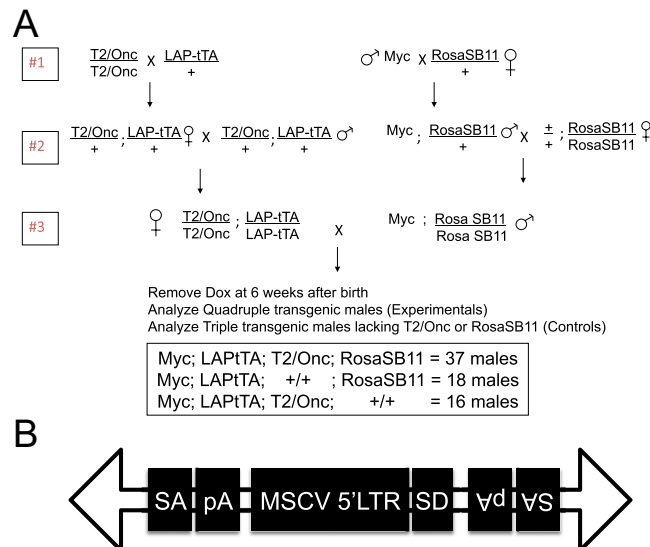

**Fig. S2.** Crossing scheme for *Sleeping Beauty* (SB) liver tumorigenesis screen and structure of the T2/Onc transgene. (A) Crossing scheme for generation of experimental and control cohorts. Individual transgenic mice were bred to obtain double-transgenic animals. These animals then were intercrossed to obtain homozygous transgenes. T2/Onc; LAPtTA females then were bred to MYC; Rosa26-SB11 males to obtain quadruple transgenics (experimental) and triple-transgenic (control) mice that lacked the transposon or transposase. (B) The T2/Onc mutagenic transposon can alter gene function in two ways. In both the sense and antisense orientations, a splice acceptor (SA) is followed by a polyadenylation signal (pA). When the transposon inserts into a gene, the gene trap may be spliced to the transcript, and the pA signal will truncate the mRNA prematurely, disrupting expression of candidate tumor-suppressor genes. Additionally, the murine stem cell virus (MSCV) 5' LTR followed by a splice donor (SD) is present in only one orientation. Transposon insertions that use the MSCV-5' LTR/SD may therefore drive expression of candidate oncogenes.

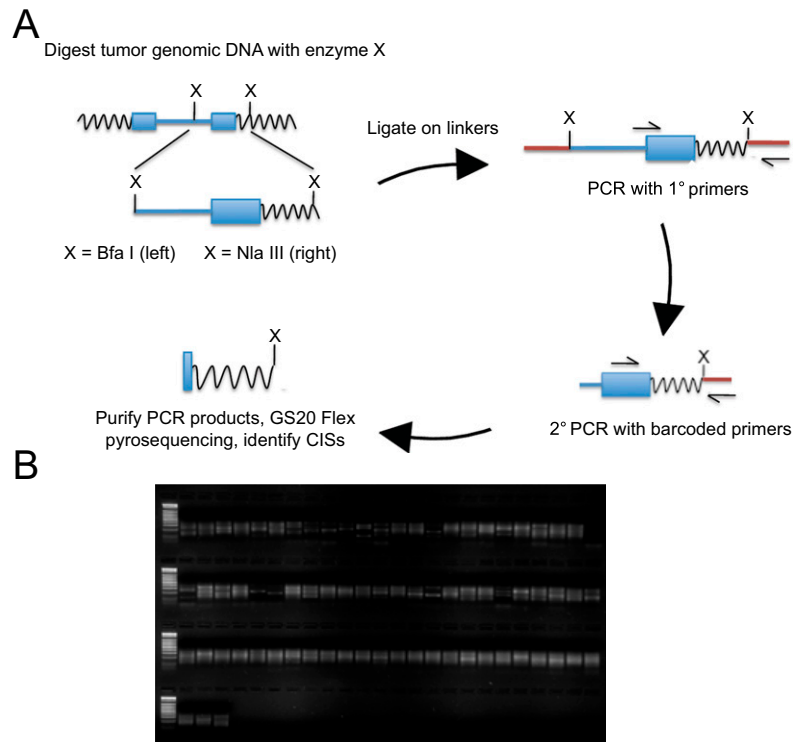

**Fig. S3.** Overview of ligation-mediated PCR and sequencing of transposon insertions. (A) Schematic of ligation-mediated PCR. Liver tumor genomic DNA (gDNA) from quadruple-transgenic animals was digested with *Bfa*I and *Nla*III enzymes. After ligation of linkers onto digested gDNA, two rounds of PCR were performed. In the second PCR, barcoded primers were used to allow pooling of samples. After purification of PCR products, the ligation-mediated PCR products were sequenced using GS20 Flex pyrosequencing. (B) Gel image of ligation-mediated PCR products. A smear of products ranging from 200–600 bp is observed.











**Table S1. Animals analyzed in SB mutagenesis screen**

| Mouse ID | Genotype                     | Sex | Tumors | No. of tumors dissected | Age at dissection (d) | Lymphoma |
|----------|------------------------------|-----|--------|-------------------------|-----------------------|----------|
| SB427    | MYC+; LAP/+; T2Onc/+; Rosa/+ | M   | N      | 0                       | 90                    | N        |
| SB440    | MYC+; LAP/+; T2Onc/+; Rosa/+ | M   | Y      | 1                       | 110                   | N        |
| SB444    | MYC+; LAP/+; T2Onc/+; Rosa/+ | M   | Y      | 4                       | 101                   | N        |
| SB445    | MYC+; LAP/+; T2Onc/+; Rosa/+ | M   | N      | 0                       | 106                   | N        |
| SB447    | MYC+; LAP/+; T2Onc/+; Rosa/+ | M   | Y      | 2                       | 88                    | N        |
| SB449    | MYC+; LAP/+; T2Onc/+; Rosa/+ | M   | Y      | 3                       | 109                   | Y        |
| SB453    | MYC+; LAP/+; T2Onc/+; Rosa/+ | M   | Y      | 1                       | 109                   | Y        |
| SB455    | MYC+; LAP/+; T2Onc/+; Rosa/+ | M   | Y      | 4                       | 109                   | N        |
| SB466    | MYC+; LAP/+; T2Onc/+; Rosa/+ | M   | N      | 0                       | 112                   | N        |
| SB471    | MYC+; LAP/+; T2Onc/+; Rosa/+ | M   | Y      | 2                       | 112                   | Y        |
| SB489    | MYC+; LAP/+; T2Onc/+; Rosa/+ | M   | Y      | 6                       | 111                   | Y        |
| SB493    | MYC+; LAP/+; T2Onc/+; Rosa/+ | M   | Y      | 2                       | 111                   | N        |
| SB498    | MYC+; LAP/+; T2Onc/+; Rosa/+ | M   | Y      | 1                       | 86                    | N        |
| SB499    | MYC+; LAP/+; T2Onc/+; Rosa/+ | M   | Y      | 2                       | 100                   | N        |
| SB500    | MYC+; LAP/+; T2Onc/+; Rosa/+ | M   | N      | 0                       | 82                    | Y        |
| SB501    | MYC+; LAP/+; T2Onc/+; Rosa/+ | M   | N      | 0                       | 86                    | N        |
| SB503    | MYC+; LAP/+; T2Onc/+; Rosa/+ | M   | Y      | 2                       | 100                   | Y        |
| SB504    | MYC+; LAP/+; T2Onc/+; Rosa/+ | M   | N      | 0                       | 82                    | Y        |
| SB506    | MYC+; LAP/+; T2Onc/+; Rosa/+ | M   | Y      | 1                       | 104                   | N        |
| SB518    | MYC+; LAP/+; T2Onc/+; Rosa/+ | M   | N      | 0                       | 111                   | N        |
| SB521    | MYC+; LAP/+; T2Onc/+; Rosa/+ | M   | Y      | 1                       | 104                   | N        |
| SB533    | MYC+; LAP/+; T2Onc/+; Rosa/+ | M   | Y      | 9                       | 106                   | N        |
| SB534    | MYC+; LAP/+; T2Onc/+; Rosa/+ | M   | Y      | 1                       | 106                   | N        |
| SB537    | MYC+; LAP/+; T2Onc/+; Rosa/+ | M   | N      | 0                       | 105                   | N        |
| SB540    | MYC+; LAP/+; T2Onc/+; Rosa/+ | M   | Y      | 6                       | 99                    | Y        |
| SB542    | MYC+; LAP/+; T2Onc/+; Rosa/+ | M   | Y      | 4                       | 99                    | N        |
| SB548    | MYC+; LAP/+; T2Onc/+; Rosa/+ | M   | Y      | 2                       | 98                    | N        |
| SB550    | MYC+; LAP/+; T2Onc/+; Rosa/+ | M   | N      | 0                       | 98                    | Y        |
| SB576    | MYC+; LAP/+; T2Onc/+; Rosa/+ | M   | N      | 0                       | 100                   | N        |
| SB577    | MYC+; LAP/+; T2Onc/+; Rosa/+ | M   | Y      | 2                       | 100                   | N        |
| SB578    | MYC+; LAP/+; T2Onc/+; Rosa/+ | M   | Y      | 1                       | 100                   | N        |
| SB579    | MYC+; LAP/+; T2Onc/+; Rosa/+ | M   | Y      | 4                       | 101                   | N        |
| SB580    | MYC+; LAP/+; T2Onc/+; Rosa/+ | M   | Y      | 1                       | 103                   | Y        |
| SB581    | MYC+; LAP/+; T2Onc/+; Rosa/+ | M   | Y      | 1                       | 103                   | N        |
| SB584    | MYC+; LAP/+; T2Onc/+; Rosa/+ | M   | N      | 0                       | 103                   | N        |
| SB586    | MYC+; LAP/+; T2Onc/+; Rosa/+ | M   | N      | 0                       | 104                   | N        |
| SB588    | MYC+; LAP/+; T2Onc/+; Rosa/+ | M   | N      | 0                       | 104                   | Y        |
| SB465    | MYC; LAP; T2Onc              | M   | N      | 0                       | 100                   | N        |
| SB485    | MYC; LAP; T2Onc              | M   | N      | 0                       | 99                    | N        |
| SB487    | MYC; LAP; T2Onc              | M   | N      | 0                       | 104                   | N        |
| SB490    | MYC; LAP; T2Onc              | M   | N      | 0                       | 99                    | N        |
| SB491    | MYC; LAP; T2Onc              | M   | N      | 0                       | 99                    | N        |
| SB508    | MYC; LAP; T2Onc              | M   | N      | 0                       | 104                   | N        |
| SB509    | MYC; LAP; T2Onc              | M   | Y      | Multiple                | 104                   | N        |
| SB510    | MYC; LAP; T2Onc              | M   | N      | 0                       | 104                   | N        |
| SB516    | MYC; LAP; T2Onc              | M   | N      | 0                       | 103                   | N        |
| SB527    | MYC; LAP; T2Onc              | M   | N      | 0                       | 104                   | N        |
| SB536    | MYC; LAP; T2Onc              | M   | Y      | 1                       | 104                   | N        |
| SB546    | MYC; LAP; T2Onc              | M   | N      | 0                       | 98                    | N        |
| SB547    | MYC; LAP; T2Onc              | M   | N      | 0                       | 98                    | N        |
| SB552    | MYC; LAP; T2Onc              | M   | N      | 0                       | 97                    | N        |
| SB590    | MYC; LAP; T2Onc              | M   | Y      | 4                       | 98                    | N        |
| SB591    | MYC; LAP; T2Onc              | M   | Y      | 3                       | 98                    | N        |
| SB418    | MYC; LAP; Rosa/+             | M   | Y      | 2                       | 108                   | N        |
| SB423    | MYC; LAP; Rosa/+             | M   | N      | 0                       | 110                   | N        |
| SB431    | MYC; LAP; Rosa/+             | M   | N      | 0                       | 110                   | N        |
| SB432    | MYC; LAP; Rosa/+             | M   | N      | 0                       | 110                   | N        |
| SB433    | MYC; LAP; Rosa/+             | M   | N      | 0                       | 110                   | N        |
| SB434    | MYC; LAP; Rosa/+             | M   | N      | 0                       | 110                   | N        |
| SB450    | MYC; LAP; Rosa/+             | M   | Y      | Multiple                | 111                   | N        |
| SB483    | MYC; LAP; Rosa/+             | M   | N      | 0                       | 92                    | N        |
| SB520    | MYC; LAP; Rosa/+             | M   | N      | 0                       | 112                   | N        |
| SB523    | MYC; LAP; Rosa/+             | M   | Y      | Multiple                | 111                   | N        |



**Table S1. Cont.**

| Mouse ID | Genotype         | Sex | Tumors | No. of tumors dissected | Age at dissection (d) | Lymphoma |
|----------|------------------|-----|--------|-------------------------|-----------------------|----------|
| SB524    | MYC; LAP; Rosa/+ | M   | Y      | 2                       | 111                   | N        |
| SB530    | MYC; LAP; Rosa/+ | M   | N      | 0                       | 109                   | N        |
| SB531    | MYC; LAP; Rosa/+ | M   | Y      | 2                       | 109                   | N        |
| SB553    | MYC; LAP; Rosa/+ | M   | Y      | 3                       | 98                    | N        |
| SB568    | MYC; LAP; Rosa/+ | M   | N      | 0                       | 101                   | N        |
| SB573    | MYC; LAP; Rosa/+ | M   | N      | 0                       | 100                   | N        |
| SB587    | MYC; LAP; Rosa/+ | M   | N      | 0                       | 98                    | N        |
| SB593    | MYC; LAP; Rosa/+ | M   | N      | 0                       | 100                   | N        |

**Table S2. Age of animals at the time of dissection**

| Cohort                                                       | No. of mice with tumors | Average age at day of dissection (d) |
|--------------------------------------------------------------|-------------------------|--------------------------------------|
| Quadruple-transgenic animals (63 tumors used for sequencing) | 24                      | 101.4                                |
| Triple-transgenic animals                                    | 10                      | 103.6                                |

**Table S3. Common insertion sites in lymphomas**

| Chromosome | Gene name            | Gene description                                               | Range (bp) | No. of tumors | No. of independent insertion positions |
|------------|----------------------|----------------------------------------------------------------|------------|---------------|----------------------------------------|
| 10         | <i>Myb</i>           | Myb proto-oncogene protein (c-myb)                             | 12,326     | 2             | 4                                      |
| 1          | <i>Ncoa2</i>         | Nuclear receptor coactivator 2 (SRC-2)                         | 41,297     | 3             | 3                                      |
| 10         | <i>5930403N24Rik</i> | Putative uncharacterized protein                               | 79,301     | 1             | 3                                      |
| 10         | <i>Specc11</i>       | Cytospin-A (SPECC1-like protein)                               | 58,520     | 2             | 1                                      |
| 13         | <i>Msh3</i>          | DNA mismatch repair protein (Repair-3 protein)                 | 96,001     | 1             | 3                                      |
| 16         | <i>Erg</i>           | Transcriptional regulator ERG                                  | 438        | 3             | 3                                      |
| 17         | <i>Sos1</i>          | Son of sevenless homolog 1                                     | 47,075     | 1             | 3                                      |
| 19         | <i>Ppp1r3c</i>       | Protein phosphatase 1 regulatory subunit 3C                    | 68,923     | 2             | 2                                      |
| 2          | <i>Ssfa2</i>         | Sperm-specific antigen 2 homolog (K <sub>r</sub> -Ras induced) | 5          | 1             | 3                                      |
| 4          | <i>Nbn</i>           | Nibrin (Nijmegen breakage syndrome protein 1 homolog)          | 64,817     | 2             | 2                                      |
| 6          | <i>Nfe2l3</i>        | Nuclear factor erythroid 2-related factor 3                    | 51,084     | 1             | 2                                      |

**Table S4. Analysis of animals 6 mo after DEN treatment**

| Genotype                | Body weight (g) | Liver weight (g) | No. of tumors | Maximum tumor size (cm) | Average tumor size (cm) | Spleen weight (g) | Liver weight (% body weight) |
|-------------------------|-----------------|------------------|---------------|-------------------------|-------------------------|-------------------|------------------------------|
| SRC-2 <sup>-/-</sup>    | 28.9            | 1.308            | 3             | 0.06                    | 0.047                   | 0.043             | 0.045                        |
| SRC-2 <sup>-/-</sup>    | 33.7            | 1.280            | 4             | 0.14                    | 0.085                   | 0.076             | 0.038                        |
| SRC-2 <sup>-/-</sup>    | 25.5            | 1.152            | 11            | 0.14                    | 0.040                   | 0.085             | 0.045                        |
| SRC-2 <sup>-/-</sup>    | 28.43           | 1.648            | 3             | 0.13                    | 0.087                   | 0.189             | 0.058                        |
| SRC-2 <sup>-/-</sup>    | 33.5            | 0.933            | 6             | 0.13                    | 0.107                   | 0.064             | 0.028                        |
| Avg.                    | 30.006          | 1.264            | 5.4           | 0.12                    | 0.073                   | 0.092             | 0.043                        |
| SE                      | 1.579           | 0.117            | 1.503         | 0.0152                  | 0.013                   | 0.025             | 0.005                        |
| SRC-2 <sup>+/+</sup>    | 34.5            | 1.664            | 0             | 0                       | 0                       | 0.146             | 0.048                        |
| SRC-2 <sup>+/+</sup>    | 35.6            | 1.690            | 0             | 0                       | 0                       | 0.167             | 0.047                        |
| SRC-2 <sup>+/+</sup>    | 30.6            | 1.296            | 2             | 0.08                    | 0.055                   | 0.107             | 0.042                        |
| SRC-2 <sup>+/+</sup>    | 32.5            | 1.473            | 1             | 0.02                    | 0.020                   | 0.097             | 0.045                        |
| SRC-2 <sup>+/+</sup>    | 35.91           | 1.768            | 4             | 0.085                   | 0.061                   | 0.175             | 0.049                        |
| Average                 | 33.822          | 1.578            | 1.4           | 0.037                   | 0.027                   | 0.138             | 0.047                        |
| SE                      | 1.003           | 0.086            | 0.748         | 0.019                   | 0.013                   | 0.016             | 0.001                        |
| Student's <i>t</i> test | 0.076           | 0.062            | 0.044         | 0.009                   | 0.037                   | 0.155             | 0.491                        |
